# Supplementary material
Source: PubMed Central journal article supplement (PMC2707207)
Supplement: supp_284_28_18557__1.pdf [file supp_284_28_18557__1.pdf]

## *F. Peter Guengerich*

---

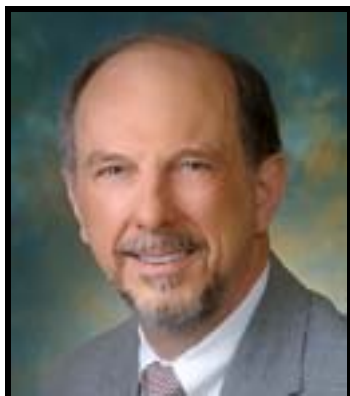

**Current Position:** Harry Pearson Broquist Professor of Biochemistry and Director of the Center in Molecular Toxicology at Vanderbilt University School of Medicine

**Education:** Ph.D. in Biochemistry (1973) from Vanderbilt University

**Non-scientific Interests:** Photography, fishing, hiking

My interest in metals biochemistry began during my postdoctoral training with Professor Minor J. Coon at the University of Michigan (1973-1975) where I was first introduced to the cytochrome P450 (P450) enzymes. I still work in the P450 field, and I also read broadly about other metalloproteins and biochemical systems that involve metals. My laboratory works on several aspects of P450 enzymology and the development of approaches to identify functions of new P450s, as well as on the interactions of DNA polymerases with modified DNA. I have been on the faculty at Vanderbilt since 1975. I have been extensively involved with *The Journal of Biological Chemistry*, serving first on the Editorial Board and as an Associate Editor since 2006. In this latter capacity, I oversee the reviews of many papers in the area of metals biochemistry, and I believe that series of articles in this field are of interest to our readers. This is the second series (the first was published in the January 9, 2009 issue of *JBC*). I invite your suggestions for future series.

---

**Read Dr. Guengerich's article entitled:** Thematic Minireview Series: Metals in Biology

<http://www.jbc.org/cgi/content/full/284/28/18557>
